# Supplementary material
Source: PubMed Central journal article supplement (PMC9296634)
Supplement: 41467_2022_31557_MOESM3_ESM.pdf [file 41467_2022_31557_MOESM3_ESM.pdf]

### **Description of Additional Supplementary Files**

File Name: Supplementary Data 1

Description: Table S3: EUROIMMUN ELISA OD values.

File Name: Supplementary Data 2

Description: IgM and IgA microarray.
